# Supplementary material for: Maternal One-Carbon Metabolism during the Periconceptional Period and Human Foetal Brain Growth: A Systematic Review
Source: MDPI journal article supplement (doi:10.3390/genes12101634), 2021-10-17
Supplement: s1 [file s1]

**Table S1.** Main terms used for the literature search on Embase.com

|                       |     |                            |     |                       |
|-----------------------|-----|----------------------------|-----|-----------------------|
| One carbon metabolism | AND | Nervous system development | AND | Pregnancy             |
| Carbon metabolism     |     | Brain size                 |     | Developmental biology |
| Folic acid            |     | Brain growth               |     | Embryo                |
| Homocysteine          |     | Neurulation                |     | Fetus                 |
| Cyanocobalamin        |     | Synaptogenesis             |     | Prenatal period       |
| B12 deficiency        |     | Brain development          |     | Prenatal exposure     |
| Methionine            |     | Neural maturation          |     | Gestation period      |

**Table S2.** ErasmusAGE quality scoring system. This quality score can be used to assess the quality of studies included in systematic reviews and meta-analyses and is applicable to both interventional and observational studies. The score was designed based on previously published scoring systems (Carter et al, 2010 and the Quality Assessment Tool for Quantitative Studies). The quality score is composed of 5 items, and each item is allocated 0, 1 or 2 points. This allows a total score between 0 and 10 points, 10 representing the highest quality.

|              |                                                                                                                                                                                                                                                                                                                                                                                                                                                                  |
|--------------|------------------------------------------------------------------------------------------------------------------------------------------------------------------------------------------------------------------------------------------------------------------------------------------------------------------------------------------------------------------------------------------------------------------------------------------------------------------|
| Study design | 0 for studies with cross-sectional data collection<br>1 for studies with longitudinal data collection (both retrospective and prospective)<br>2 for intervention studies                                                                                                                                                                                                                                                                                         |
| Study size   | 0 small population for analysis (N = 20-199)<br>1 intermediate population for analysis (N = 200-2999)<br>2 large population for analysis (N > 3000)                                                                                                                                                                                                                                                                                                              |
| Exposure     | <i>Observational studies</i><br>0 if the study used no appropriate exposure measurement method or if not reported<br>1 if the study used moderate quality exposure measurement methods<br>2 if the study used adequate exposure measurement methods<br><br><i>Intervention studies</i><br>0 if the intervention was not described or not blinded<br>1 if the intervention was adequately single blinded.<br>2 if the intervention was adequately double-blinded. |
| Outcome      | 0 if the study used no appropriate outcome measurement method or if not reported<br>1 if the study used moderate quality outcome measurement methods (one fetal outcome measure)<br>2 if the study used adequate outcome measurement methods (multiple fetal outcome measures)                                                                                                                                                                                   |
| Adjustments  | 0 if findings are not controlled for at least key confounders<br>1 if findings are controlled for key confounders<br>2 if findings are additionally controlled for additional covariates <u>or</u> when an intervention is adequately randomized                                                                                                                                                                                                                 |

**Table S3.** Main characteristics of the 26 included studies.

| Author (year)                           | Country                | Study period | Study design | Study population                                       | Sample size | Exposures                                                                                                                                                | Outcome(s)                                      | Quality score |
|-----------------------------------------|------------------------|--------------|--------------|--------------------------------------------------------|-------------|----------------------------------------------------------------------------------------------------------------------------------------------------------|-------------------------------------------------|---------------|
| Bergen <i>et al.</i> (2016)             | Netherlands            | 2001-2005    | Cohort study | Healthy pregnant women                                 | 5890        | Plasma tHcy, serum vitamin B <sub>12</sub> , plasma folate                                                                                               | Foetal HC                                       | 8             |
| Steenweg-de Graaff <i>et al.</i> (2017) | Netherlands            | Not reported | Cohort study | Healthy pregnant women                                 | 5928        | Plasma folate, preconception folic acid supplement use                                                                                                   | Foetal head size, HC and growth                 | 8             |
| Timmermans <i>et al.</i> (2009)         | Netherlands            | 2002-2006    | Cohort study | Healthy pregnant women                                 | 6353        | Periconceptional and early pregnancy folic acid supplement use                                                                                           | Foetal HC                                       | 8             |
| Yusuf <i>et al.</i> (2019)              | Florida                | 2010-2014    | RCT          | Healthy pregnant women who were current smokers        | 345         | 0.8 mg (control) or 4 mg (high-dose, intervention) folic acid supplement/day                                                                             | Foetal HC, neonatal brain weight and BBR        | 8             |
| Christian <i>et al.</i> (2003)          | Nepal                  | 1998-2001    | RCT          | Healthy pregnant women                                 | 4926        | Folic acid (400 µg/day), folic acid-iron (60 mg ferrous fumarate), folic acid-iron-zinc (30 mg zinc sulphate), and multiple micronutrient supplement use | Neonatal HC                                     | 7             |
| Nilsen <i>et al.</i> (2010)             | Norway                 | 2002-2003    | Cohort study | Healthy pregnant women                                 | 2934        | Plasma tHcy and folate, FFQ, folic acid supplement use                                                                                                   | Neonatal HC                                     | 7             |
| Timmermans <i>et al.</i> (2012)         | Netherlands            | 2001-2006    | Cohort study | Healthy pregnant women                                 | 3207        | Plasma tHcy, serum vitamin B <sub>12</sub> , plasma folate, FFQ, periconceptional folic acid supplement use                                              | Foetal HC                                       | 7             |
| Zou <i>et al.</i> (2020)                | Netherlands            | 2002-2006    | Cohort study | Healthy pregnant women                                 | 2095        | Plasma folate, folic acid and multiple micronutrient supplement use                                                                                      | Foetal brain size                               | 7             |
| Bulloch <i>et al.</i> (2020)            | Australia, New Zealand | 2004-2011    | Cohort study | Healthy pregnant women                                 | 5606        | Intake of green leafy vegetables, folic acid supplement use                                                                                              | Neonatal HC                                     | 6             |
| Catena <i>et al.</i> (2019)             | Spain                  | 2001-2003    | RCT          | Healthy pregnant women                                 | 85          | 5-m-THF supplement use                                                                                                                                   | Neonatal HC                                     | 6             |
| Husen <i>et al.</i> (2021)              | Netherlands            | Not reported | Cohort study | Healthy women from spontaneous or IVF/ICSI pregnancies | 166         | Self-reported questionnaire                                                                                                                              | Foetal brain structures (DTD, MTD, TTL and TTR) | 6             |
| Koning <i>et al.</i> (2015)             | Netherlands            | 2009-2010    | Cohort study | Healthy pregnant women                                 | 259         | Serum and RBC folate, periconceptional folic acid supplement use                                                                                         | Foetal cerebellar growth                        | 6             |

|                                             |             |                 |                              | (spontaneous<br>and IVF/ICSI<br>pregnancies)                                 |      |                                                                                                                                                           | (TCD, RCD<br>and LCD)                                   |   |
|---------------------------------------------|-------------|-----------------|------------------------------|------------------------------------------------------------------------------|------|-----------------------------------------------------------------------------------------------------------------------------------------------------------|---------------------------------------------------------|---|
| Lecorguillè<br><i>et al.</i> (2020)         | France      | 2003-<br>2006   | Cohort<br>study              | Healthy<br>pregnant<br>women                                                 | 1638 | FFQ, dietary<br>supplementation use                                                                                                                       | Neonatal HC                                             | 6 |
| Parisi <i>et al.</i><br>(2018)              | Netherlands | 2013-<br>2015   | Cohort<br>study              | Healthy<br>pregnant<br>women<br>(spontaneous<br>and IVF/ICSI<br>pregnancies) | 126  | Fasting plasma tHcy,<br>serum vitamin B <sub>12</sub> , serum<br>and RBC folate, FFQ,<br>periconceptional folic acid<br>supplement use                    | Foetal<br>cerebellum<br>(TCD)                           | 6 |
| Tan <i>et al.</i><br>(2021)                 | Canada      | 2014-<br>2016   | Cohort<br>study              | Healthy<br>pregnant<br>women                                                 | 709  | Non-fasting serum tHcy<br>and vitamin B <sub>12</sub>                                                                                                     | Neonatal HC                                             | 6 |
| Brough <i>et al.</i><br>(2010)              | UK          | 2002-<br>2004   | RCT                          | Healthy<br>pregnant<br>women                                                 | 402  | Multiple micronutrient<br>supplement use, RBC<br>folate                                                                                                   | Neonatal HC                                             | 5 |
| Koning <i>et al.</i><br>(2017)              | Netherlands | 2013-<br>2015   | Cohort<br>study              | Healthy<br>pregnant<br>women<br>(spontaneous<br>and IVF/ICSI<br>pregnancies) | 182  | Folic acid supplement use                                                                                                                                 | Foetal<br>cerebellar<br>growth<br>(TCD, RCD<br>and LCD) | 5 |
| Nakanishi <i>et al.</i><br>(2021)           | Japan       | 2012-<br>2014   | Cohort<br>study              | Healthy<br>pregnant<br>women                                                 | 124  | Non-fasting plasma<br>choline                                                                                                                             | Neonatal HC                                             | 5 |
| Nemescu <i>et al.</i><br>(2020)             | Romania     | 2018-<br>2019   | Cohort<br>study              | Healthy<br>pregnant<br>women                                                 | 385  | Folic acid supplement use                                                                                                                                 | Foetal brain<br>structures<br>(MO distance<br>and BPD)  | 5 |
| Schlotz <i>et al.</i><br>(2010)             | UK          | Not<br>reported | Cohort<br>study              | Healthy<br>pregnant<br>women                                                 | 139  | RBF folate, FFQ, folic acid<br>supplement use                                                                                                             | Neonatal HC                                             | 5 |
| Gadgil <i>et al.</i><br>(2014)              | India       | 2006-<br>2008   | Cross-<br>sectional<br>study | Healthy<br>pregnant<br>women                                                 | 49   | Plasma tHcy, vitamin B <sub>12</sub><br>and folate, dietary recall,<br>FFQ, pregnancy folic acid<br>and vitamin B <sub>12</sub><br>supplement use         | Neonatal HC                                             | 4 |
| Hosseini-<br>nezhad <i>et al.</i><br>(2011) | Iran        | Not<br>reported | Cohort<br>study              | Healthy<br>pregnant<br>women                                                 | 113  | Serum tHcy and folate,<br>multivitamin supplement<br>use, FFQ                                                                                             | Neonatal HC                                             | 4 |
| Takimoto <i>et al.</i><br>(2011)            | Japan       | 2007-<br>2008   | Cohort<br>study              | Healthy<br>pregnant<br>women                                                 | 33   | Non-fasting plasma tHcy,<br>serum vitamin B <sub>12</sub> , serum<br>folate, vitamin B <sub>6</sub> , dietary<br>intake survey, vitamin<br>supplement use | Neonatal HC                                             | 4 |
| Jiang <i>et al.</i><br>(2016)               | China       | 2015-<br>2016   | Cohort<br>study              | Healthy<br>pregnant<br>women                                                 | 116  | Serum tHcy, vitamin B <sub>12</sub><br>and folate                                                                                                         | Neonatal HC                                             | 3 |

|                               |       |           |              |                        |     |                                                                                                                                                       |             |   |
|-------------------------------|-------|-----------|--------------|------------------------|-----|-------------------------------------------------------------------------------------------------------------------------------------------------------|-------------|---|
| Neumann <i>et al.</i> (2013)  | Kenya | 1984-1986 | Cohort study | Healthy pregnant women | 138 | Quantitative weighing of food and dietary recall                                                                                                      | Neonatal HC | 3 |
| Takimoto <i>et al.</i> (2007) | Japan | 2001-2003 | Cohort study | Healthy pregnant women | 94  | Non-fasting plasma tHcy, serum vitamin B <sub>12</sub> , serum and RBC folate, vitamin B <sub>6</sub> , dietary intake survey, vitamin supplement use | Neonatal HC | 3 |

---

Abbreviations: brain-body weight ratio (BBR), biparietal diameter (BPD), diencephalon total diameter (DTD), food frequency questionnaire (FFQ), head circumference (HC), mesencephalon-to-occiput distance (MO), mesencephalon total diameter (MTD), randomized control trial (RCT), red blood cell (RBC), right cerebellar diameter (RCD), left cerebellar diameter (LCD), left and right telencephalon thickness (TTL and TTR), transcerebellar diameter (TCD), total homocysteine (tHcy).
